# Supplementary material
Source: PubMed Central journal article supplement (PMC2716065)
Supplement: NIHMS123439-supplement-Full_citations.pdf [file NIHMS123439-supplement-Full_citations.pdf]

# Supplementary Information

## A Surface Enhanced Raman Scattering based Ligase Detection Reaction

*Yun Suk Huh<sup>a</sup>, Adam J. Lowe<sup>b</sup>, Aaron D. Strickland<sup>c</sup>, Carl A. Batt<sup>c\*</sup>, and David Erickson<sup>a\*</sup>*

<sup>a</sup> Sibley School of Mechanical and Aerospace Engineering, Cornell University, Ithaca, NY 14853, USA.

<sup>b</sup> Department of Microbiology, Cornell University, Ithaca, NY 14853, USA

<sup>c</sup> Department of Food Science and Chemistry and Chemical Biology, Cornell University, Ithaca, NY 14853, USA

## REFERENCES

1. Wang, D. G.; Fan, J. B.; Siao, C. J.; Berno, A.; Young, P.; Sapolsky, R.; Ghandour, G.; Perkins, N.; Winchester, E.; Spencer, J.; Kruglyak, L.; Stein, L.; Hsie, L.; Topaloglou, T.; Hubbell, E.; Robinson, E.; Mittmann, M.; Morris, M. S.; Shen, N.; Kilburn, D.; Rioux, J.; Nusbaum, C.; Rozen, S.; Hudson, T. J.; Lipshutz, R.; Chee, M.; Lander, E. S. *Science* **1998**, *280*, 1077.
3. Sachidanandam, R.; Weissman, D.; Schmidt, S. C.; Kakol, J. M.; Stein, L. D.; Marth, G.; Sherry, S.; Mullikin, J. C.; Mortimore, B. J.; Willey, D. L.; Hunt, S. E.; Cole, C. G.; Coggill, P. C.; Rice, C. M.; Ning, Z.; Rogers, J.; Bentley, D. R.; Kwok, P. Y.; Mardis, E. R.; Yeh, R. T.; Schultz, B.; Cook, L.; Davenport, R.; Dante, M.; Fulton, L.; Hillier, L.; Waterston, R. H.; McPherson, J. D.; Gilman, B.; Schaffner, S.; Van Etten, W. J.; Reich, D.; Higgins, J.; Daly, M. J.; Blumenstiel, B.; Baldwin, J.; Stange-Thomann, N.; Zody, M. C.; Linton, L.; Lander, E. S.; Altshuler, D. *Nature* **2001**, *409*, 928.
10. Zheng, S. L.; Sun, J. L.; Wiklund, F.; Smith, S.; Stattin, P.; Li, G.; Adami, H. O.; Hsu, F. C.; Zhu, Y.; Balter, K.; Kader, A. K.; Turner, A. R.; Liu, W. N.; Bleecker, E. R.; Meyers, D. A.; Duggan, D.; Carpten, J. D.; Chang, B. L.; Isaacs, W. B.; Xu, J. F.; Gronberg, H. *N. Engl. J. Med.* **2008**, *358*, 910.
